# Supplementary material for: Valorisation of Sargassum muticum through the extraction of phenolic compounds using eutectic solvents and intensification techniques
Source: Royal Society of Chemistry journal article supplement (doi:10.1039/d3su00051f), 2023-01-01
Supplement: d3su00051f1.pdf [file d3su00051f1.pdf]

## Supporting Information

### A. Phenolic compounds

#### A.1. ESs screening

**Table S.1.** Results of the total phenolic content (TPC), total flavonoids content (TFC) and the antioxidant activity in inhibition percentage for all the solvents tested as extraction solvents: water, ethanol and other 26 ESs with 30% (v/v).

LD: detection limit

| Solvent            | TPC (mg/g) | TFC (mg/g) | TEAC (mg/g) |
|--------------------|------------|------------|-------------|
| Water              | 5.64±0.03  | 10.17±0.14 | 0.50±1.50   |
| Ethanol            | 3.70±0.13  | 7.40±0.20  | 1.86±0.18   |
| Bet:Gly (1:4)      | 9.38±0.63  | 9.50±0.14  | 1.76±0.11   |
| Bet:PPG (1:4)      | 7.33±0.18  | 10.57±0.31 | 1.85±0.12   |
| Bet:1.2-But (1:3)  | 5.29±1.36  | 13.89±0.06 | 1.30±0.37   |
| Bet:1.2-But (1:4)  | 5.60±0.99  | 11.09±0.17 | 1.86±0.10   |
| Bet:1.3-But (1:4)  | 2.92±1.32  | 7.36±0.17  | 1.67±0.34   |
| Bet:LA (1:1)       | 2.90±1.26  | 4.75±0.09  | 1.69±0.25   |
| Bet:LA (1:2)       | 2.29±1.42  | 2.40±0.15  | 1.34±2.79   |
| Bet:LA (1:3)       | 8.22±0.38  | 6.58±0.01  | 1.22±1.06   |
| Pro:Gly (1:4)      | 14.14±0.03 | 9.72±0.85  | 1.34±0.84   |
| Pro:PPG (1:4)      | 15.26±0.08 | 13.66±0.22 | 0.63±0.55   |
| Pro:1.2-But (1:3)  | 15.30±0.06 | 15.26±0.40 | 0.78±0.80   |
| Pro:1.2-But (1:4)  | 14.84±0.10 | 20.61±0.02 | <LD         |
| Pro:1.3-But (1:4)  | 8.30±0.07  | 12.68±0.01 | <LD         |
| Pro:LA (1:1)       | 11.48±0.01 | 7.32±0.03  | 0.18±4.50   |
| Pro:LA (1:2)       | 9.75±0.03  | 6.09±0.17  | 0.65±3.50   |
| Pro:LA (1:3)       | 10.99±0.05 | 5.55±0.02  | 0.70±2.298  |
| ChCl:Gly (1:4)     | 10.88±1.26 | 11.88±0.09 | 2.12±0.21   |
| ChCl:PPG (1:4)     | <LD        | 9.15±0.09  | 1.99±0.07   |
| ChCl:1.2-But (1:3) | 0.20±7.39  | 11.64±0.02 | 2.05±0.10   |
| ChCl:1.3-But (1:4) | 3.71±0.43  | 7.49±0.05  | 1.75±0.21   |
| ChCl:LA (1:1)      | <LD        | 6.10±0.07  | 0.60±1.95   |
| ChCl:LA (1:2)      | <LD        | 3.72±0.05  | 0.49±2.36   |
| ChCl:LA (1:3)      | 0.23±1.46  | 3.00±0.16  | <LD         |
| ChCl:CA (2:1)      | 0.49±4.54  | 2.46±0.69  | 0.35±2.52   |
| ChCl:CA (1:1)      | 0.93±6.69  | 1.78±0.42  | 0.62±1.14   |
| ChCl:CA (1:2)      | 0.33±2.66  | 1.85±0.06  | 0.57±0.52   |

**Table S.2.** HPLC results in µg/g of dry weight for each of the ESs with 30% (v/v) of water tested on the screening.  
 BD: Bellow detection.

| Solvent       | Gallic acid | 3,4-Dihydroxybenzoic acid | Catechin | Caffeic acid | Syringic acid | Coumaric acid | Ferulic acid | Salicylic acid | Quercetin |
|---------------|-------------|---------------------------|----------|--------------|---------------|---------------|--------------|----------------|-----------|
| Water         | 6.14±0.09   | 7.32±0.10                 | BD       | BD           | 2.52±0.23     | BD            | BD           | 7.01±3.78      | 0.36±0.55 |
| Ethanol       | 6.26±0.22   | 8.10±0.33                 | BD       | BD           | BD            | BD            | BD           | 5.14±2.40      | BD        |
| Bet:Gly (1:4) | 6.07±0.01   | 9.53±0.81                 | BD       | BD           | 2.46±0.12     | BD            | BD           | 4.98±5.07      | BD        |

|                    |            |            |           |    |            |    |    |             |            |
|--------------------|------------|------------|-----------|----|------------|----|----|-------------|------------|
| Bet:PPG (1:4)      | 6.07±0.04  | 8.23±0.33  | BD        | BD | BD         | BD | BD | 3.07±0.29   | BD         |
| Bet:1.2-But (1:3)  | 8.74±0.07  | 8.06±0.45  | BD        | BD | 2.33±0.07  | BD | BD | 13.63±0.31  | BD         |
| Bet:1.2-But (1:4)  | 17.73±0.30 | 8.20±0.26  | BD        | BD | 2.39±0.11  | BD | BD | 24.73±9.15  | BD         |
| Bet:1.3-But (1:4)  | 6.21±0.13  | 8.26±0.05  | BD        | BD | 2.42±0.28  | BD | BD | 27.16±3.18  | BD         |
| Bet:LA (1:1)       | 6.20±0.04  | 10.45±0.28 | BD        | BD | 2.53±0.21  | BD | BD | 6.94±0.31   | 0.75±0.09  |
| Bet:LA (1:2)       | 6.09±0.01  | 10.10±0.11 | BD        | BD | 2.48±0.10  | BD | BD | 14.41±0.20  | 0.90±0.54  |
| Bet:LA (1:3)       | 6.08±0.02  | 11.20±1.28 | BD        | BD | 2.80±0.69  | BD | BD | 27.25±1.14  | 0.54±0.74  |
| Pro:Gly (1:4)      | 6.11±0.03  | 8.68±0.28  | BD        | BD | 2.36±0.43  | BD | BD | 12.17±0.79  | BD         |
| Pro:PPG (1:4)      | 6.17±0.20  | 10.85±0.31 | 9.48±0.89 | BD | 2.30±0.06  | BD | BD | 181.67±1.46 | BD         |
| Pro:1.2-But (1:3)  | 15.21±0.38 | 8.22±0.41  | BD        | BD | BD         | BD | BD | 17.06±0.58  | BD         |
| Pro:1.2-But (1:4)  | 28.98±0.30 | 8.63±0.17  | BD        | BD | 12.91±0.74 | BD | BD | 69.29±0.04  | BD         |
| Pro:1.3-But (1:4)  | 6.07±0.07  | 7.94±0.39  | BD        | BD | 2.37±0.21  | BD | BD | 26.30±6.85  | 0.51±0.29  |
| Pro:LA (1:1)       | 9.65±0.35  | 8.49±1.76  | BD        | BD | 2.43±0.80  | BD | BD | 17.35±1.24  | 0.04±7.99  |
| Pro:LA (1:2)       | 9.64±1.20  | 8.31±0.40  | BD        | BD | 2.59±0.13  | BD | BD | 18.44±1.30  | 0.02±10.29 |
| Pro:LA (1:3)       | 9.16±1.30  | 8.84±0.37  | BD        | BD | 2.65±0.71  | BD | BD | 27.51±1.98  | 1.56±1.11  |
| ChCl:Gly (1:4)     | BD         | 8.23±0.27  | BD        | BD | BD         | BD | BD | 4.59±7.87   | BD         |
| ChCl:PPG (1:4)     | 6.18±0.02  | 8.38±0.39  | BD        | BD | 2.40±0.08  | BD | BD | 5.31±1.25   | BD         |
| ChCl:1.2-But (1:3) | 19.39±0.70 | 8.22±0.32  | BD        | BD | BD         | BD | BD | 17.24±0.31  | BD         |
| ChCl:1.3-But (1:4) | 6.31±0.05  | 8.00±0.35  | BD        | BD | 2.33±0.61  | BD | BD | 15.44±2.43  | 0.61±4.28  |
| ChCl:LA (1:1)      | BD         | 10.57±1.29 | BD        | BD | 2.44±0.36  | BD | BD | 26.35±0.55  | 0.18±1.38  |
| ChCl:LA (1:2)      | 6.17±0.14  | 9.64±1.92  | BD        | BD | 2.61±0.12  | BD | BD | 36.41±10.37 | 0.67±0.65  |
| ChCl:LA (1:3)      | 6.08±0.01  | 11.42±1.92 | BD        | BD | 2.78±0.18  | BD | BD | 21.12±0.85  | 1.69±2.44  |
| ChCl:CA (2:1)      | 43.17±0.20 | 9.76±0.08  | BD        | BD | BD         | BD | BD | 13.65±0.15  | 1.52±0.65  |
| ChCl:CA (1:1)      | 29.52±0.62 | 9.68±0.43  | BD        | BD | 2.26±0.33  | BD | BD | 9.07±1.20   | 19.47±0.82 |
| ChCl:CA (1:2)      | 28.76±0.23 | 9.623±0.74 | BD        | BD | 2.32±0.70  | BD | BD | 10.01±3.98  | 4.81±0.22  |

**Table S.3.** Dissociation constants for the nine phenolic compounds characterized in the HPLC.

| Phenolic Compounds               | pKa                       | Reference |
|----------------------------------|---------------------------|-----------|
| <b>Gallic acid</b>               | $pK_{a1} = 4.4 \pm 0.1$   | 1         |
|                                  | $pK_{a2} = 8.8 \pm 0.1$   |           |
|                                  | $pK_{a3} = 10.0 \pm 0.1$  |           |
|                                  | $pK_{a4} = 11.4 \pm 0.1$  |           |
| <b>3,4-Dihydroxybenzoic acid</b> | $pK_{a1} = 4.35 \pm 0.05$ | 2         |
|                                  | $pK_{a2} = 8.79 \pm 0.05$ |           |
|                                  | $pK_{a3} = 13.0 \pm 0.1$  |           |
| <b>Catechin</b>                  | $pK_{a1} = 8.68 \pm 0.23$ | 3         |
|                                  | $pK_{a2} = 9.70 \pm 0.24$ |           |

|                               |                                                                                         |   |
|-------------------------------|-----------------------------------------------------------------------------------------|---|
|                               | $pK_{a_3} = 11.55 \pm 0.20$                                                             |   |
| <b>Caffeic acid</b>           | $pK_{a_1} = 4.43 \pm 0.02$<br>$pK_{a_2} = 8.69 \pm 0.03$                                | 4 |
| <b><i>p</i>-Coumaric acid</b> | $pK_{a_1} = 4.360 \pm 0.003$<br>$pK_{a_2} = 8.982 \pm 0.001$                            | 4 |
| <b>Ferulic acid</b>           | $pK_{a_1} = 4.52$<br>$pK_{a_2} = 9.39$                                                  | 4 |
| <b>Salicylic acid</b>         | $pK_{a_1} = 2.80 \pm 0.04$<br>$pK_{a_2} = 13.4 \pm 0.2$                                 | 2 |
| <b>Syringic acid</b>          | $pK_{a_1} = 4.30$<br>$pK_{a_2} = 9.10$                                                  | 5 |
| <b>Quercetin</b>              | $pK_{a_1} = 7.10 \pm 0.12$<br>$pK_{a_2} = 9.09 \pm 0.11$<br>$pK_{a_3} = 11.12 \pm 0.36$ | 6 |

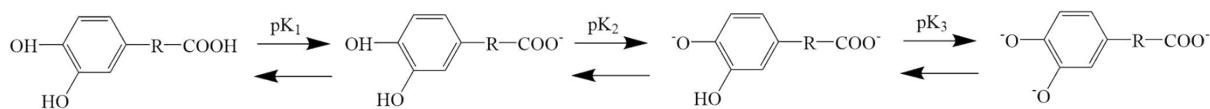

**Fig S.1.** Deprotonation step for a general phenolic acid. Adapted from Beltran et al. <sup>4</sup>.

The ChCl:CA (2:1) with 30% (v/v) of water presents a very low pH (pH = 0.60), and thus all the PCs evaluated are in their protonated form, considering the pKa values present in **Table S.3**. On the other hand, the aqueous solutions of the two selected proline-based ESs have a neutral pH, 6.68 and 6.46 for Pro:PPG (1:4) and Pro:1,2-But (1:4), respectively. At neutral pH only catechin and quercetin are fully protonated and both gallic acid and salicylic acid are deprotonated.

### A.3. Optimization

#### Water optimization

**Table S.4.** Results of TPC, TFC and TEAC percentage for the optimization of water content.  
LD: detection limit

| Solvent | Water content % (v/v) | TPC (mg/g) | TFC (mg/g) | TEAC (mg/g) |
|---------|-----------------------|------------|------------|-------------|
|---------|-----------------------|------------|------------|-------------|

|                   |    |            |            |           |
|-------------------|----|------------|------------|-----------|
| Pro:PPG (1:4)     | 10 | 4.80±0.08  | 1.36±1.41  | 1.03±0.37 |
|                   | 20 | 10.46±0.05 | 10.69±0.20 | 0.82±0.88 |
|                   | 40 | 12.33±0.01 | 14.77±0.35 | 0.39±1.45 |
|                   | 50 | 13.25±0.08 | 14.76±0.05 | <LD       |
| Pro:1,2-But (1:4) | 10 | 5.74±0.50  | 5.51±0.23  | <LD       |
|                   | 20 | 7.96±0.07  | 10.79±0.45 | <LD       |
|                   | 40 | 13.72±0.10 | 15.38±0.40 | <LD       |
|                   | 50 | 12.45±0.07 | 20.31±0.04 | <LD       |
| ChCl:CA (2:1)     | 10 | 3.14±2.13  | 2.33±0.16  | 0.39±5.41 |
|                   | 20 | 6.04±1.65  | 2.00±0.15  | 0.81±3.24 |
|                   | 40 | 8.50±0.26  | 5.62±0.16  | 0.25±3.54 |
|                   | 50 | 7.44±2.26  | 7.82±0.05  | 0.59±3.08 |

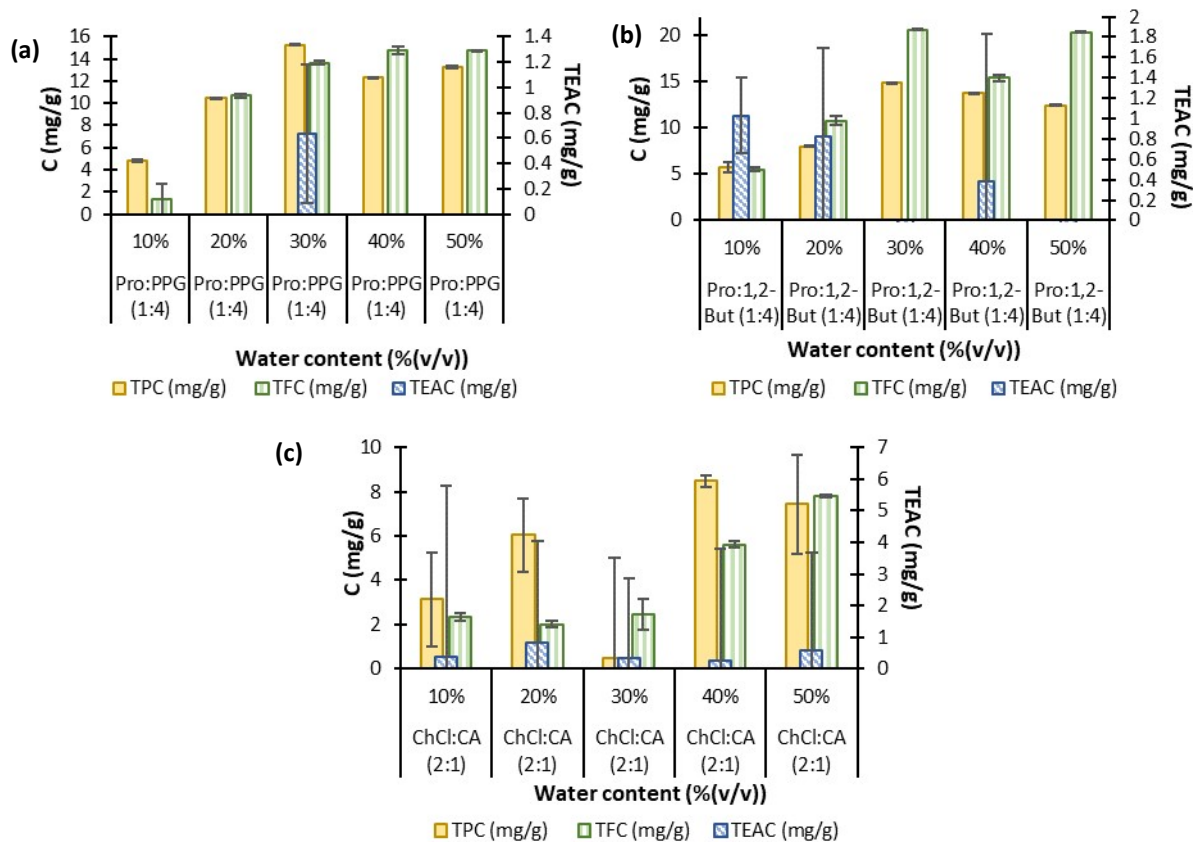

Fig S.2. Evaluation of TPC (yellow), TFC (green) and TEAC (blue) for water content optimization for (a) Pro:PPG (1:4), (b) Pro:1,2-But (1:4), (c) ChCl:CA (2:1).

Table S.5. HPLC results in  $\mu\text{g/g}$  of dry weight for the water content optimization for the three best ES chosen. BD: Bellow detection.

| Water content %v/v        | 10%                  | 20%       | 40%        | 50%        |
|---------------------------|----------------------|-----------|------------|------------|
|                           | <b>Pro:PPG (1:4)</b> |           |            |            |
| Gallic acid               | BD                   | BD        | 6.09±0.08  | 6.07±0.01  |
| 3,4-Dihydroxybenzoic acid | 7.58±0.22            | 8.99±0.19 | 9.97±0.07  | 10.21±0.24 |
| Catechin                  | BD                   | BD        | 32.51±0.45 | 30.12±0.29 |

|                           |            |            |            |            |
|---------------------------|------------|------------|------------|------------|
| Caffeic acid              | BD         | BD         | BD         | BD         |
| Syringic acid             | BD         | BD         | 2.45±0.14  | 2.48±0.48  |
| Coumaric acid             | BD         | BD         | BD         | BD         |
| Ferulic acid              | BD         | BD         | BD         | BD         |
| Salicylic acid            | 77.09±0.22 | 69.33±0.60 | 48.14±0.63 | 41.08±0.98 |
| Quercetin                 | BD         | BD         | BD         | BD         |
| <b>Pro:1,2-But (1:4)</b>  |            |            |            |            |
| Gallic acid               | 23.68±0.74 | 19.42±0.37 | 9.11±0.40  | 8.88±1.68  |
| 3,4-Dihydroxybenzoic acid | 7.90±0.14  | 8.52±0.03  | 9.20±0.56  | 9.51±0.76  |
| Catechin                  | BD         | BD         | BD         | BD         |
| Caffeic acid              | BD         | BD         | BD         | BD         |
| Syringic acid             | BD         | BD         | 2.53±0.19  | 2.52±0.31  |
| Coumaric acid             | BD         | BD         | BD         | BD         |
| Ferulic acid              | BD         | BD         | BD         | BD         |
| Salicylic acid            | 30.57±1.00 | 80.76±0.14 | 16.76±1.27 | 53.11±2.46 |
| Quercetin                 | 0.07±22.27 | 0.31±0.65  | 0.85±0.73  | 0.46±3.01  |
| <b>ChCl:CA (2:1)</b>      |            |            |            |            |
| Gallic acid               | 9.72±0.58  | 9.17±0.37  | 9.92±0.66  | 8.38±0.70  |
| 3,4-Dihydroxybenzoic acid | 7.40±0.77  | 7.72±0.01  | 7.80±0.14  | 8.18±0.12  |
| Catechin                  | BD         | BD         | BD         | BD         |
| Caffeic acid              | BD         | BD         | BD         | BD         |
| Syringic acid             | BD         | 2.33±0.03  | BD         | BD         |
| Coumaric acid             | BD         | BD         | BD         | BD         |
| Ferulic acid              | BD         | BD         | BD         | BD         |
| Salicylic acid            | 6.31±4.50  | 9.59±4.10  | 5.73±5.05  | 6.16±8.71  |
| Quercetin                 | BD         | BD         | BD         | BD         |

### Temperature optimization

**Table S.6.** Results of the TPC, TFC and TEAC for the temperature optimization.  
LD: detection limit

| ES                | T (°C) | TPC (mg/g) | TFC (mg/g) | TEAC (mg/g) |
|-------------------|--------|------------|------------|-------------|
| Pro:PPG (1:4)     | 50     | 10.18±0.10 | 11.67±0.09 | 23.40±5.58  |
|                   | 70     | 11.84±0.36 | 15.88±0.18 | 57.55±1.18  |
| Pro:1,2-But (1:4) | 50     | 5.93±0.06  | 12.25±0.13 | 47.18±4.27  |
|                   | 70     | 12.29±0.05 | 21.21±0.10 | <LD         |
| ChCl:CA (2:1)     | 50     | 3.20±2.83  | 4.32±0.06  | <LD         |
|                   | 70     | 7.59±1.91  | 7.63±1.91  | 40.93±0.56  |

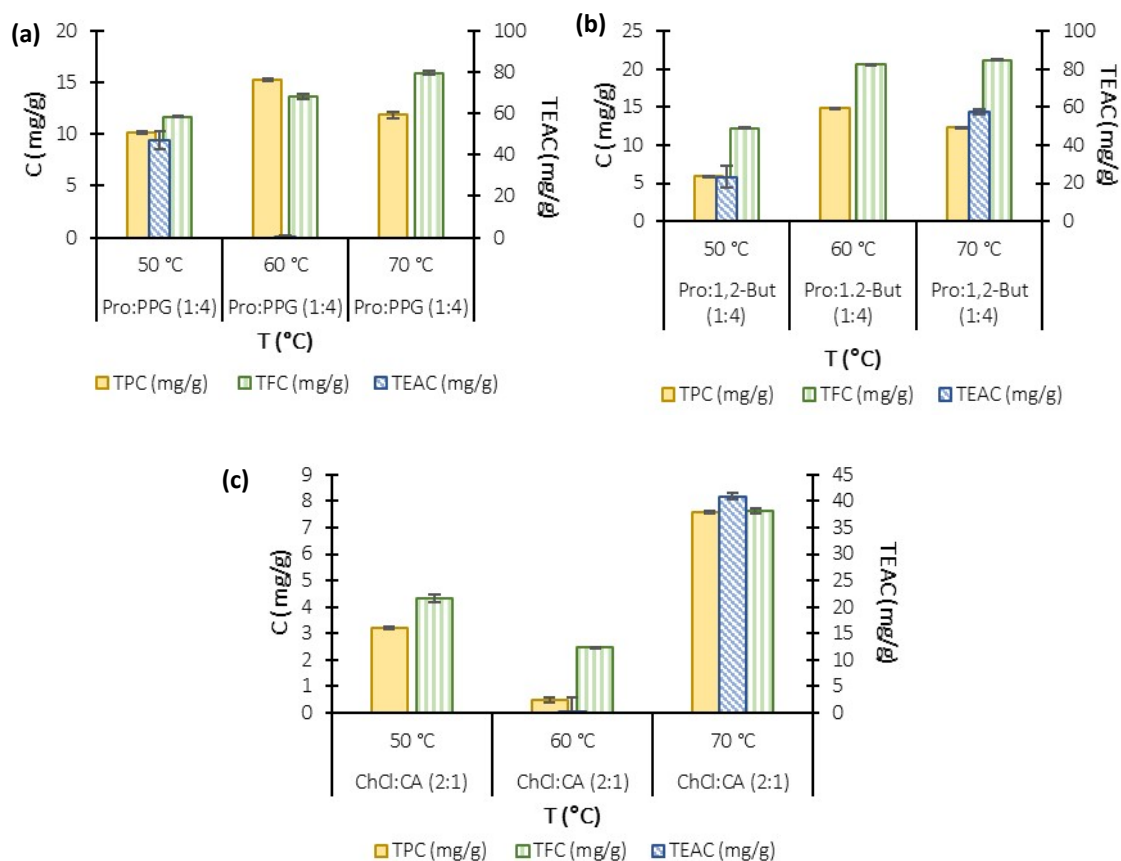

**Fig S.3.** Evaluation of the TPC (yellow), TFC (green) and TEAC (blue) for the temperature optimization in the orbital shaker: (a) Pro:PPG (1:4), (b) Pro:1,2-but (1:4) and (c) ChCl:CA (2:1) all with 30% (v/v)

**Table S.7.** HPLC results in  $\mu\text{g/g}$  of dry weight for the temperature optimization. BD: Bellow detection.

| Temperature (°C)          | 50         | 70          |
|---------------------------|------------|-------------|
| <b>Pro:PPG (1:4)</b>      |            |             |
| Galic acid                | BD         | BD          |
| 3,4-Dihydroxybenzoic acid | 9.24±0.03  | 9.14±0.06   |
| Catechin                  | BD         | BD          |
| Caffeic acid              | BD         | BD          |
| Syringic acid             | BD         | BD          |
| Coumaric acid             | BD         | BD          |
| Ferulic acid              | BD         | BD          |
| Salicylic acid            | 27.13±0.22 | 130.97±0.30 |
| Quercetin                 | BD         | BD          |
| <b>Pro:1.2-But (1:4)</b>  |            |             |
| Galic acid                | 14.86±0.09 | 28.07±2.12  |
| 3,4-Dihydroxybenzoic acid | 8.97±0.06  | 9.06±0.50   |
| Catechin                  | BD         | BD          |
| Caffeic acid              | BD         | BD          |
| Syringic acid             | BD         | 2.51±0.07   |

|                                  |            |            |
|----------------------------------|------------|------------|
| <b>Coumaric acid</b>             | BD         | BD         |
| <b>Ferulic acid</b>              | BD         | BD         |
| <b>Salicylic acid</b>            | 59.45±1.94 | 69.64±0.89 |
| <b>Quercetin</b>                 | BD         | BD         |
| <b>ChCl:CA (2:1)</b>             |            |            |
| <b>Gallic acid</b>               | 10.16±0.31 | 8.68±0.68  |
| <b>3,4-Dihydroxybenzoic acid</b> | 7.62±0.26  | 8.00±0.23  |
| <b>Catechin</b>                  | BD         | BD         |
| <b>Caffeic acid</b>              | BD         | BD         |
| <b>Syringic acid</b>             | BD         | 2.32±0.08  |
| <b>Coumaric acid</b>             | BD         | BD         |
| <b>Ferulic acid</b>              | BD         | BD         |
| <b>Salicylic acid</b>            | 6.06±2.25  | 7.28±6.87  |
| <b>Quercetin</b>                 | BD         | BD         |

#### A.4. Intensification techniques

##### UAE

**Table S.8.** Results of the total phenolic content (TPC), total flavonoids content (TFC) and the antioxidant activity in inhibition percentage for the ultrasound assisted extractions.

LD: detection limit

| ES                       | Conditions      | TPC (mg/g) | TFC (mg/g) | TEAC (mg/g) |
|--------------------------|-----------------|------------|------------|-------------|
| <b>Pro:PPG (1:4)</b>     | UAE 20W, 1,5min | 10.85±6.98 | 10.11±0.94 | <LD         |
|                          | UAE 20W, 3min   | 18.30±3.76 | 16.35±0.19 | <LD         |
|                          | UAE 10W, 3min   | 14.33±4.61 | 11.22±1.01 | <LD         |
|                          | UAE 10W, 6min   | 22.94±3.03 | 16.76±0.18 | <LD         |
|                          | UAE 10W, 9min   | 27.94±5.65 | 20.57±0.30 | <LD         |
| <b>Pro:1.2-But (1:4)</b> | UAE 20W, 1,5min | 13.86±4.07 | 12.57±0.24 | <LD         |
|                          | UAE 20W, 3min   | 20.20±2.83 | 17.62±0.17 | <LD         |
|                          | UAE 10W, 3min   | 16.98±3.44 | 14.98±0.13 | <LD         |
|                          | UAE 10W, 6min   | 20.11±2.90 | 19.81±0.28 | <LD         |
|                          | UAE 10W, 9min   | 38.12±1.51 | 23.98±0.11 | <LD         |
| <b>ChCl:CA (2:1)</b>     | UAE 20W, 1,5min | 8.73±6.12  | 4.90±0.23  | 0.26±1,95   |
|                          | UAE 20W, 3min   | 4.62±8.96  | 4.26±0.27  | <LD         |
|                          | UAE 10W, 3min   | 12.27±1.43 | 5.41±0.31  | <LD         |
|                          | UAE 10W, 6min   | 8.99±5.17  | 6.57±0.78  | <LD         |
|                          | UAE 10W, 9min   | 8.74±5.16  | 9.38±0.10  | <LD         |

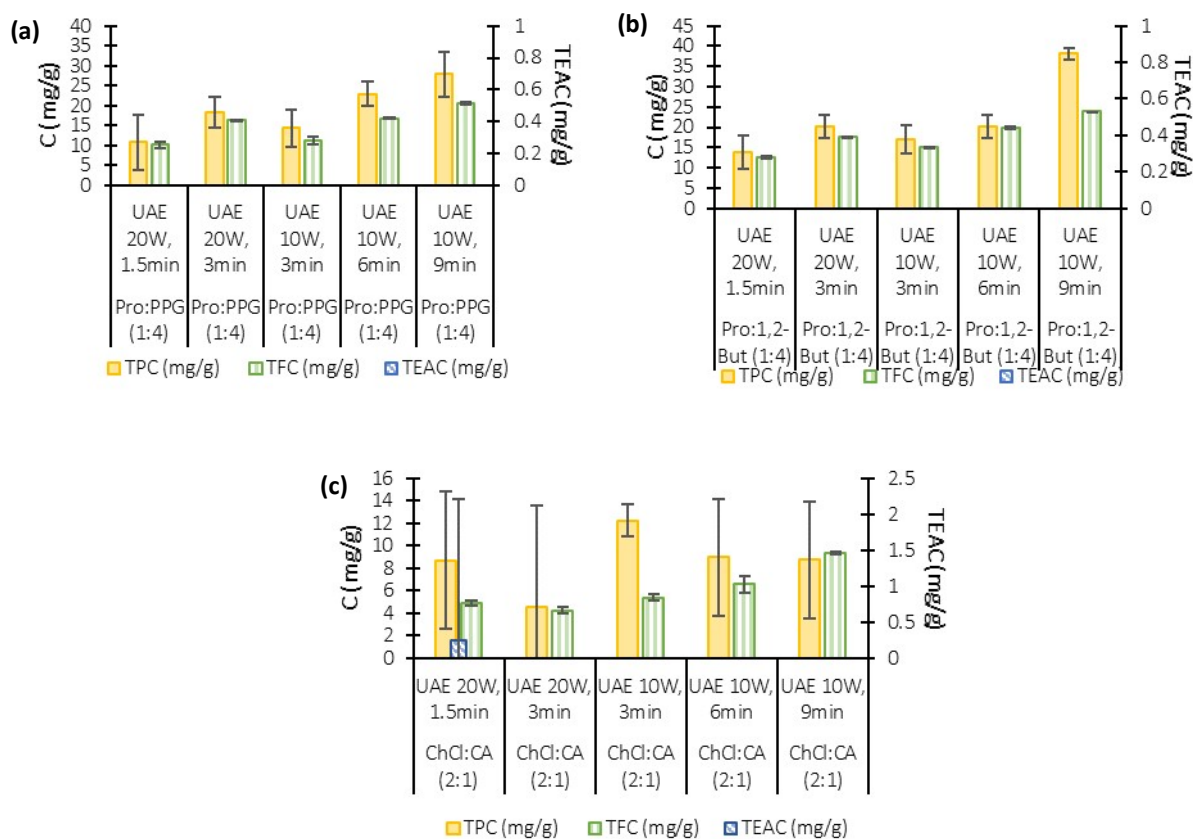

**Fig S.4.** UAE results of TPC (yellow), TFC and TEAC (blue) for the three chosen DES with 30% (v/v) of water: (a) Pro:PPG (1:4) (b) Pro:1,4-But (1:4), (c) ChCl:CA (2:1).

**Table S.9.** HPLC results in  $\mu\text{g/g}$  of dry weight for the ultrasound assisted extraction for the three best ESs containing 30% (v/v) of water. BD: Bellow detection.

| UAE conditions            | 1.5 min, 20W | 3 min, 20W | 3 min, 10W | 6 min, 10W  | 9 min, 10W  |
|---------------------------|--------------|------------|------------|-------------|-------------|
| <b>Pro:PPG (1:4)</b>      |              |            |            |             |             |
| Gallic acid               | BD           | BD         | BD         | BD          | BD          |
| 3,4-Dihydroxybenzoic acid | 7.22±0.08    | 7.33±0.09  | 7.24±0.04  | 7.33±0.20   | 7.38±0.01   |
| Catechin                  | BD           | BD         | BD         | BD          | BD          |
| Caffeic acid              | BD           | BD         | BD         | BD          | BD          |
| Syringic acid             | BD           | 2.44±0.13  | BD         | 2.37±0.12   | 2.38±1.76   |
| Coumaric acid             | BD           | BD         | BD         | BD          | BD          |
| Ferulic acid              | BD           | BD         | BD         | BD          | BD          |
| Salicylic acid            | 14.23±1.24   | 29.49±3.31 | 23.42±4.99 | 130.44±1.76 | 160.30±1.76 |
| Quercetin                 | BD           | BD         | BD         | BD          | BD          |
| <b>Pro:1.2-But (1:4)</b>  |              |            |            |             |             |
| Gallic acid               | 17.46±0.82   | 22.45±1.10 | 18.40±0.98 | 25.26±1.18  | 30.94±0.31  |
| 3,4-Dihydroxybenzoic acid | 7.06±0.03    | 7.22±0.01  | 7.27±0.02  | 7.21±0.03   | 7.09±0.03   |
| Catechin                  | BD           | BD         | BD         | BD          | BD          |
| Caffeic acid              | BD           | BD         | BD         | BD          | BD          |



|                           |            |            |            |            |            |
|---------------------------|------------|------------|------------|------------|------------|
| Syringic acid             | BD         | BD         | 2.33±0.06  | 2.32±0.07  | 2.30±0.06  |
| Coumaric acid             | BD         | BD         | BD         | BD         | BD         |
| Ferulic acid              | BD         | BD         | BD         | BD         | BD         |
| Salicylic acid            | 21.30±2.82 | 28.54±1.25 | 18.60±0.48 | 28.66±2.16 | 29.63±1.40 |
| Quercetin                 | BD         | BD         | BD         | BD         | BD         |
| <b>ChCl:CA (2:1)</b>      |            |            |            |            |            |
| Gallic acid               | 6.05±0.02  | 6.08±0.03  | 6.29±0.10  | 6.20±0.05  | 6.35±0.09  |
| 3,4-Dihydroxybenzoic acid | 7.34±0.10  | 7.45±0.03  | 7.13±0.04  | 7.40±0.11  | 7.58±0.13  |
| Catechin                  | BD         | BD         | BD         | BD         | BD         |
| Caffeic acid              | BD         | BD         | BD         | BD         | BD         |
| Syringic acid             | 2.43±0.10  | 2.52±0.12  | 2.34±0.04  | 2.49±0.12  | 2.67±0.27  |
| Coumaric acid             | BD         | BD         | BD         | BD         | BD         |
| Ferulic acid              | BD         | BD         | BD         | BD         | BD         |
| Salicylic acid            | 11.31±5.77 | 18.63±0.85 | 12.24±1.24 | 21.80±1.23 | 28.26±0.70 |
| Quercetin                 | BD         | BD         | BD         | BD         | BD         |

**Table S.10.** Temperatures measured after the UAE extraction.

| Power (W) | Time (min) | Temperature (°C) |
|-----------|------------|------------------|
| 10        | 9          | 103.9            |
| 10        | 6          | 96.3             |
| 10        | 3          | 83.4             |
| 20        | 3          | 98.6             |
| 20        | 1.5        | 98.4             |

## **MAE**

**Table S.11.** Results of the TPC, TFC and TEAC for the microwave assisted extractions.  
LD: Limit detection

| ES                       | Conditions         | TPC (mg/g) | TFC (mg/g) | TEAC (mg/g) |
|--------------------------|--------------------|------------|------------|-------------|
| <b>Pro:PPG (1:4)</b>     | MAE 100 °C, 1,5min | 22.59±2.55 | 23.41±0.25 | <LD         |
|                          | MAE 100 °C, 3min   | 20.86±2.86 | 18.78±0.03 | <LD         |
|                          | MAE 100 °C, 6min   | 24.43±2.36 | 21.77±0.61 | 0.34±2.17   |
|                          | MAE 60 °C, 3min    | 9.89±5.78  | 8.41±0.33  | <LD         |
|                          | MAE 60 °C, 6min    | 12.28±4.89 | 11.79±0.36 | <LD         |
|                          | MAE 60 °C, 9min    | 13.29±4.30 | 9.07±0.14  | <LD         |
| <b>Pro:1,2-But (1:4)</b> | MAE 100 °C, 1,5min | 17.82±3.35 | 19.25±0.05 | <LD         |
|                          | MAE 100 °C, 3min   | 23.86±2.43 | 19.88±0.56 | <LD         |
|                          | MAE 100 °C, 6min   | 19.96±2.96 | 18.96±0.27 | 0.50±0.60   |
|                          | MAE 60 °C, 3min    | 12.91±4.43 | 9.02±0.17  | <LD         |
|                          | MAE 60 °C, 6min    | 9.31±6.17  | 7.71±0.40  | <LD         |
|                          | MAE 60 °C, 9min    | 8.70±6.80  | 11.29±0.22 | <LD         |

|                      |                    |            |            |            |
|----------------------|--------------------|------------|------------|------------|
| <b>ChCl:CA (2:1)</b> | MAE 100 °C, 1,5min | 4.71±9.43  | 8.85±0.13  | 0.07±4.92  |
|                      | MAE 100 °C, 3min   | 6.79±7.30  | 8.65±0.16  | <LD        |
|                      | MAE 100 °C 6min    | 2.71±0.80  | 11.02±0.18 | 0.77±0.19  |
|                      | MAE 60 °C, 3min    | 3.90±12.64 | 3.55±0.15  | 0.32±4.29  |
|                      | MAE 60 °C, 6min    | 4.24±11.14 | 3.56±0.11  | 0.40±2.56  |
|                      | MAE 60 °C, 9min    | 4.05±11.80 | 3.91±0.13  | 0.23±10.85 |
|                      | MAE 60 °C, 12min   | 1.66±26.17 | 3.99±0.20  | 0.70±3.62  |

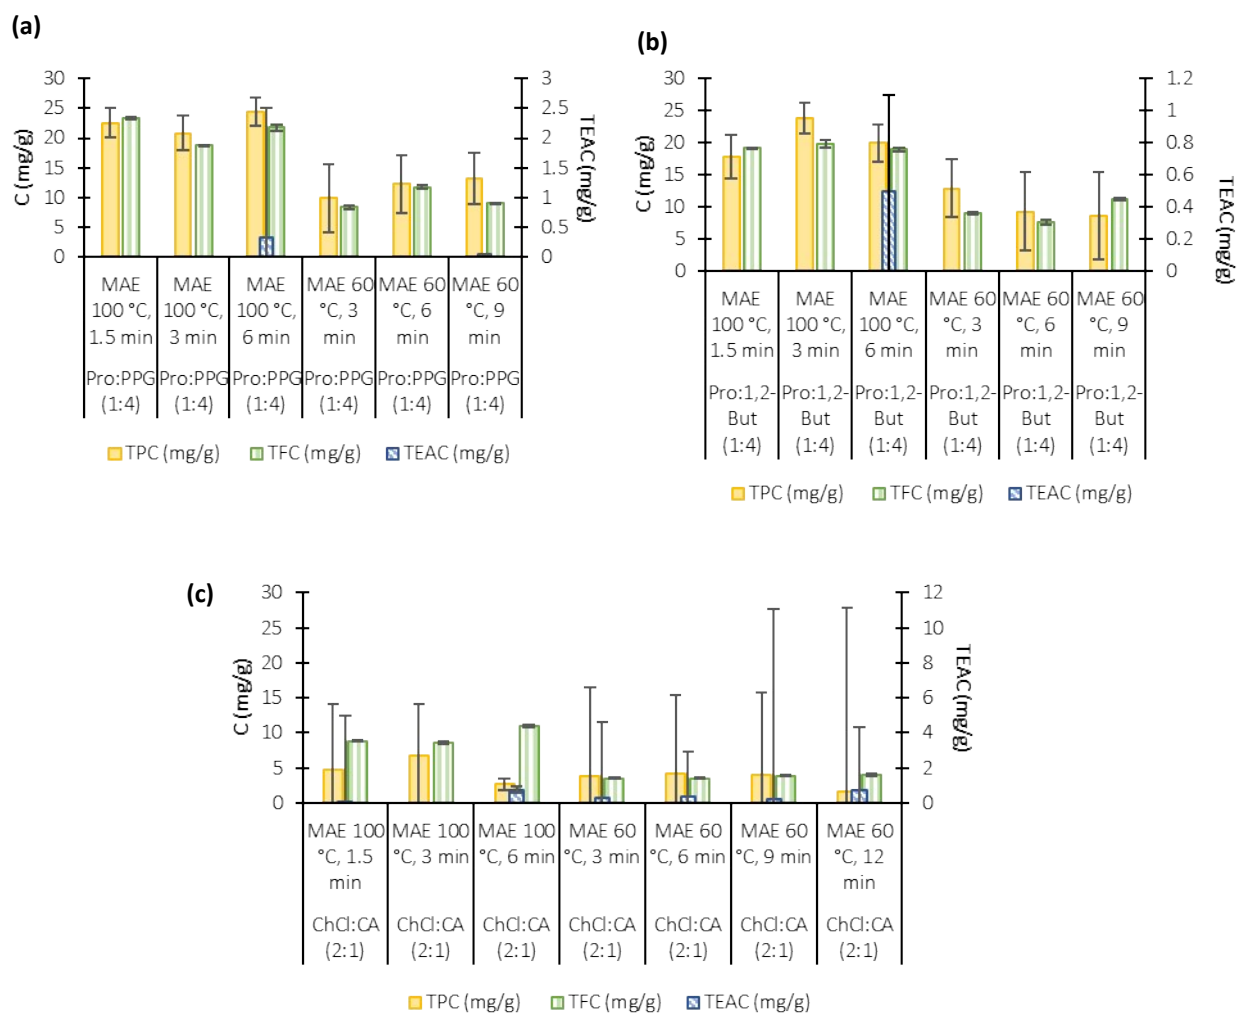

**Fig S.5.** Evaluation of the TPC, TFC (green) and TEAC (blue) for the microwave assisted extractions for the three chosen ESs with 30% (v/v) of water: (a) Pro:PPG (1:4), (b) Pro:1,4-But (1:4), (c) ChCl:CA (2:1).

**Table S.12.** HPLC results in  $\mu\text{g/g}$  of dry weight for the microwave assisted extractions for the three best ESs. BD: Bellow detection.

| MAE conditions       | 1.5 min, 100 °C | 3 min, 100 °C | 6 min, 100 °C | 3 min, 60 °C | 6 min, 60 °C | 9 min, 60 °C | 12 min, 60 °C |
|----------------------|-----------------|---------------|---------------|--------------|--------------|--------------|---------------|
| <b>Pro:PPG (1:4)</b> |                 |               |               |              |              |              |               |
| Gallic acid          | BD              | BD            | 6.60±0.18     | BD           | BD           | BD           | --            |
| 3,4-                 | 7.75±0.05       | 7.52±0.04     | 7.58±0.21     | 7.18±0.08    | 7.32±0.14    | 7.17±0.06    | --            |

| Dihydroxybenzoic acid     |             |             |             |            |            |            |           |
|---------------------------|-------------|-------------|-------------|------------|------------|------------|-----------|
| Catechin                  | BD          | BD          | 10.09±1.40  | BD         | 3.90±0.30  | BD         | --        |
| Caffeic acid              | BD          | BD          | BD          | BD         | BD         | BD         | --        |
| Syringic acid             | BD          | BD          | BD          | BD         | BD         | BD         | --        |
| Coumaric acid             | BD          | BD          | BD          | BD         | BD         | BD         | --        |
| Ferulic acid              | BD          | BD          | BD          | BD         | BD         | BD         | --        |
| Salicylic acid            | 170.92±2.28 | 190.87±3.25 | 261.14±0.63 | 16.69±0.30 | 26.94±0.42 | 19.57±0.61 | --        |
| Quercetin                 | BD          | BD          | BD          | BD         | BD         | BD         | --        |
| Pro:1.2-But (1:4)         |             |             |             |            |            |            |           |
| Gallic acid               | 27.51±0.27  | 31.65±0.83  | 40.56±0.40  | 18.56±0.22 | 17.51±0.95 | 13.48±0.03 | --        |
| 3,4-Dihydroxybenzoic acid | 7.55±0.18   | 7.44±0.10   | 7.59±2.61   | 7.08±0.02  | 7.17±0.06  | 7.22±0.02  | --        |
| Catechin                  | BD          | BD          | BD          | BD         | BD         | BD         | --        |
| Caffeic acid              | BD          | BD          | BD          | BD         | BD         | BD         | --        |
| Syringic acid             | BD          | BD          | 2.65±0.10   | BD         | BD         | BD         | --        |
| Coumaric acid             | BD          | BD          | BD          | BD         | BD         | BD         | --        |
| Ferulic acid              | BD          | BD          | BD          | BD         | BD         | BD         | --        |
| Salicylic acid            | 25.84±3.39  | 24.59±0.51  | 25.92±2.57  | 3.98±3.29  | 26.29±0.25 | 24.37±1.27 | --        |
| Quercetin                 | BD          | BD          | BD          | BD         | BD         | BD         | --        |
| ChCl:CA (2:1)             |             |             |             |            |            |            |           |
| Gallic acid               | 6.25±0.05   | BD          | 7.68±0.74   | 6.08±0.17  | 6.09±0.10  | 6.06±0.03  | 6.64±0.13 |
| 3,4-Dihydroxybenzoic acid | 7.70±0.19   | 7.89±0.06   | 8.68±0.19   | 7.46±0.14  | 7.35±0.20  | 7.46±0.16  | 7.70±0.12 |
| Catechin                  | BD          | BD          | BD          | BD         | BD         | BD         | BD        |
| Caffeic acid              | BD          | BD          | BD          | BD         | BD         | BD         | BD        |
| Syringic acid             | BD          | 2.57±0.07   | BD          | 2.86±0.39  | 2.33±0.09  | 2.41±0.47  | 2.66±0.28 |
| Coumaric acid             | BD          | BD          | BD          | BD         | BD         | BD         | BD        |
| Ferulic acid              | BD          | BD          | BD          | BD         | BD         | BD         | BD        |
| Salicylic acid            | 26.19±2.40  | 10.67±2.39  | 23.44±1.20  | 18.47±2.17 | 14.56±0.40 | 16.74±0.99 | 8.77±2.38 |
| Quercetin                 | 0.34±1.77   | BD          | 0.38±4.33   | BD         | BD         | BD         | BD        |

## A.5. Extraction with cycles

**Table S.13.** Results of the TPC, TFC and TEAC for the extractions performed with cycles.  
LD: detection limit

| 3 <sup>rd</sup> Cycle | TPC (mg/L)   | TFC (mg/L)   | TEAC (mg/g) |
|-----------------------|--------------|--------------|-------------|
| w/out combination     | 5398.66±1.29 | 5469.09±0.04 | 37.18±0.82  |
| Combination w/ cycles | 6649.71±1.03 | 6012.84±0.09 | <LD         |

**Table S.14.** HPLC results in mg/L of the extraction cycles performed without combination of extracts between the cycles.  
BD: Bellow detection

| Cycle | 1 | 2 | 3 |
|-------|---|---|---|
|-------|---|---|---|

| S:L                       | 1.3 g/13 mL | 0.8 g/8 mL | 0.45 g/4.5 mL |
|---------------------------|-------------|------------|---------------|
| Gallic acid               | 0.63±0.14   | 0.64±0.20  | 0.79±0.85     |
| 3,4-Dihydroxybenzoic acid | 0.76±0.22   | 0.80±0.18  | 0.72±0.26     |
| Catechin                  | BD          | BD         | 2.29±1.06     |
| Caffeic acid              | BD          | BD         | BD            |
| Syringic acid             | 0.23±0.22   | 0.24±0.17  | 0.31±0.57     |
| Coumaric acid             | BD          | BD         | BD            |
| Ferulic acid              | BD          | BD         | BD            |
| Salicylic acid            | 4.45±2.92   | 7.49±0.64  | 72.16±0.59    |
| Quercetin                 | BD          | BD         | 0.02±28.77    |

**Table S.15.** HPLC results in mg/L of the extraction cycles performed with the combination of extracts between the cycles. BD: Bellow detection

| Cycle                     | 1          | 2          | 3           |
|---------------------------|------------|------------|-------------|
| S:L                       | 3x0,5g/5mL | 2x0,4g/4mL | 0,46g/4.6mL |
| Gallic acid               | BD         | 0.62±0.11  | 0.73±1.68   |
| 3,4-Dihydroxybenzoic acid | 0.75±0.21  | BD         | BD          |
| Catechin                  | 2.59±2.21  | BD         | 0.43±6.66   |
| Caffeic acid              | BD         | BD         | BD          |
| Syringic acid             | 0.25±0.53  | 0.26±0.50  | 0.59±1.08   |
| Coumaric acid             | BD         | BD         | BD          |
| Ferulic acid              | BD         | BD         | BD          |
| Salicylic acid            | 44.11±1.09 | 81.93±0.29 | 156.30±0.39 |
| Quercetin                 | BD         | 0.02±8-85  | 0.06±12.36  |

## A.6. COSMO-RS

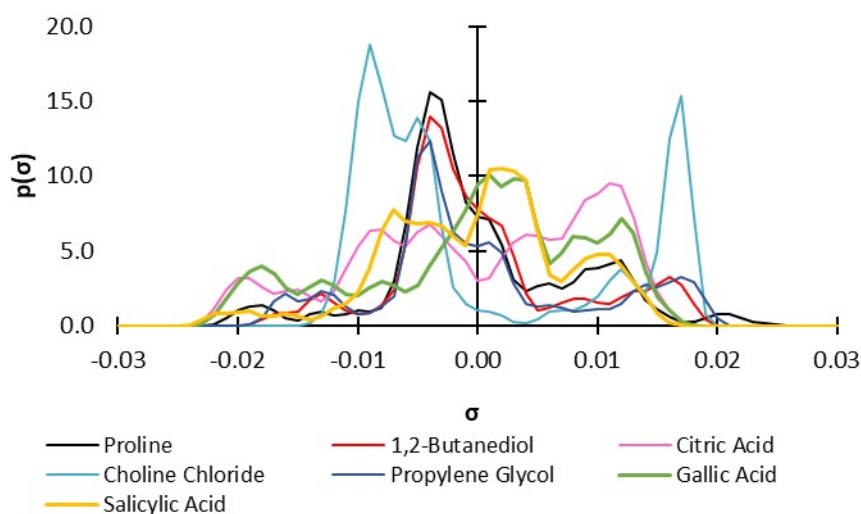

**Fig S.6.**  $\sigma$ -profiles of salicylic acid (yellow) gallic acid (green) and of the compounds that compose the three best ESs selected: proline (black), choline chloride (light blue), propylene glycol (dark blue) 1,2-butanediol (red) and citric acid (pink)

## B. Characterization of ESs and polarity

### B.1. ES densities & viscosities

#### Pro:PPG (1:4)

The densities of the ES made with proline and propylene glycol with a 1:4 ratio were measured at different temperatures in order to have the variation of the density with the temperature.

**Table S.16.** Densities measure at different temperatures for the pure ES Pro:PPG (1:4).

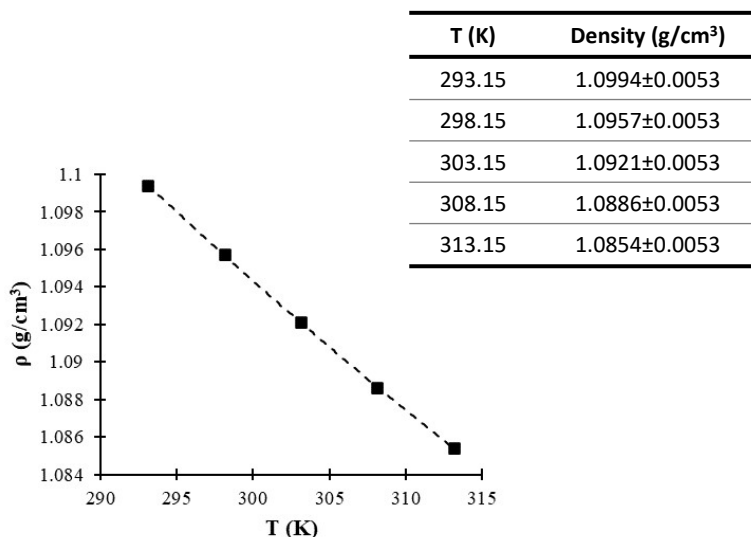

**Fig S.7.** Densities at different temperature from 293.15 to 313.15 K for the pure ES:  $\rho = (3.14 \pm 1.63) \times 10^{-6} T^2 + (-89.06 \pm 9.81) \times 10^{-5} T + (1159.71 \pm 1.41) \times 10^{-3}$  with  $R^2 = 0.9999$

**Table S.17.** Densities measured for different contents of water at 25 °C for Pro:PPG (1:4).

| Water content %(v/v) | Density (g/cm <sup>3</sup> ) |
|----------------------|------------------------------|
| 10.08                | 1.0942±0.0053                |

|       |               |
|-------|---------------|
| 20.10 | 1.0911±0.0053 |
| 30.11 | 1.0856±0.0053 |
| 40.17 | 1.0776±0.0054 |
| 50.24 | 1.0670±0.0054 |

**Table S.18.**  
temperatures for  
30% (v/v) of

| T (K)  | $\eta$ pure ES (mPa.s) | $\eta$ ES 30% (v/v) water (mPa.s) |
|--------|------------------------|-----------------------------------|
| 293.15 | --                     | 21.30±0.40                        |
| 298.15 | 175.98±0.77            | 16.65±0.34                        |
| 303.15 | 128.11±0.77            | 13.26±0.28                        |
| 308.15 | 95.19±0.81             | 10.73±0.21                        |
| 313.15 | 72.09±0.86             | 8.84±0.15                         |
| 318.15 | 55.57±0.90             | 7.34±0.10                         |
| 323.15 | 43.54±0.96             | 6.18±0.06                         |
| 328.15 | 34.63±1.07             | --                                |
| 333.15 | 27.93±1.17             | --                                |
| 338.15 | 22.81±1.24             | --                                |
| 343.15 | 18.84±1.24             | --                                |
| 348.15 | 15.73±1.18             | --                                |
| 353.15 | 13.25±1.09             | --                                |

Viscosities measure at different  
the pure ES Pro:PPG (1:4) and with  
water.

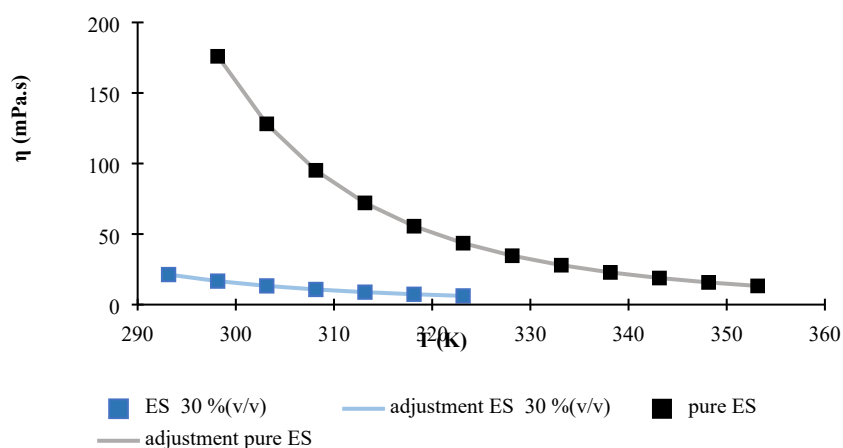

**Fig S.8.** Viscosities at different temperature for the pure ES Pro:PPG (1:4) (black) and with 30% (v/v) of water (blue).

**Table S.19.** VFT fitting parameters for the viscosity adjustment for Pro:PPG (1:4) without water and with 30% (v/v).

|          | pure Pro:PPG (1:4) | Pro:PPG (1:4) with 30% (v/v) of water |
|----------|--------------------|---------------------------------------|
| $A_\eta$ | -10.662            | -3.371                                |
| $B_\eta$ | 1201.973           | 809.636                               |
| $C_\eta$ | 163.483            | 167.218                               |
| $R^2$    | 0.99999            | 0.99997                               |

**Pro:1.2-But (1:4)**

**Table S.20.** Densities measure at different temperatures for the pure ES Pro:1,4-But (1:4).

| T (°C) | Density (g/cm <sup>3</sup> ) |
|--------|------------------------------|
| 20     | 1.0626±0.0054                |
| 25     | 1.0589±0.0055                |
| 30     | 1.0552±0.0055                |
| 35     | 1.0517±0.0055                |
| 40     | 1.0484±0.0055                |

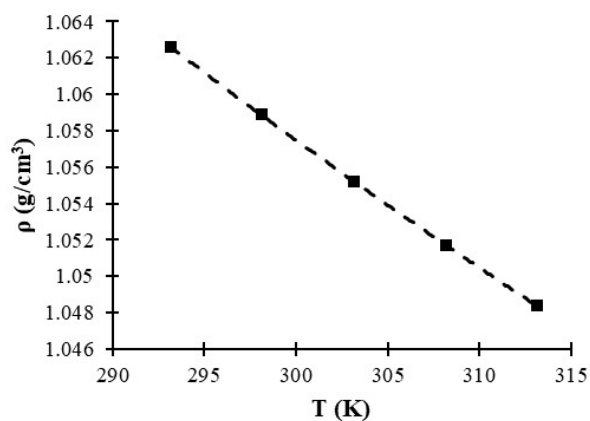

**Fig S.9.** Pure ES Pro:1,2-But (1:4) densities variations with temperature:  $y = (31.43 \pm 5.75) \times 10^{-7} x^2 + (-89.86 \pm 3.47) \times 10^{-5} x + (10793.11 \pm 5.00) \times 10^{-4}$  with  $R^2 = 0.99999$

**Table S.21.** Densities measured for different contents of water at 25 °C for Pro:1,4-But (1:4).

| Water content<br>%(v/v) | Density (g/cm <sup>3</sup> ) |
|-------------------------|------------------------------|
| 10.18                   | 1.0603±0.0054                |
| 21.12                   | 1.0597±0.0055                |
| 30.45                   | 1.0573±0.0055                |
| 40.27                   | 1.0538±0.0055                |
| 50.27                   | 1.0482±0.0055                |

**Table S.22.** Viscosities measure at different temperatures for the pure ES Pro:1,4-But (1:4) and with 30% (v/v) of water.

| T (K)  | η pure ES (mPa.s) | η ES 30% (v/v) water (mPa.s) |
|--------|-------------------|------------------------------|
| 293.15 | --                | 22.57±0.06                   |
| 298.15 | 172.05±1.26       | 17.58±0.12                   |
| 303.15 | 124.02±1.05       | 13.96±0.15                   |
| 308.15 | 91.31±0.88        | 11.26±0.25                   |
| 313.15 | 68.52±0.72        | 9.24±0.28                    |
| 318.15 | 52.36±0.64        | 7.65±0.32                    |
| 323.15 | 40.68±0.55        | 6.42±0.35                    |
| 328.15 | 32.21±0.10        | --                           |
| 333.15 | 25.78±0.09        | --                           |
| 338.15 | 20.91±0.10        | --                           |
| 343.15 | 17.17±0.11        | --                           |
| 348.15 | 14.28±0.29        | --                           |

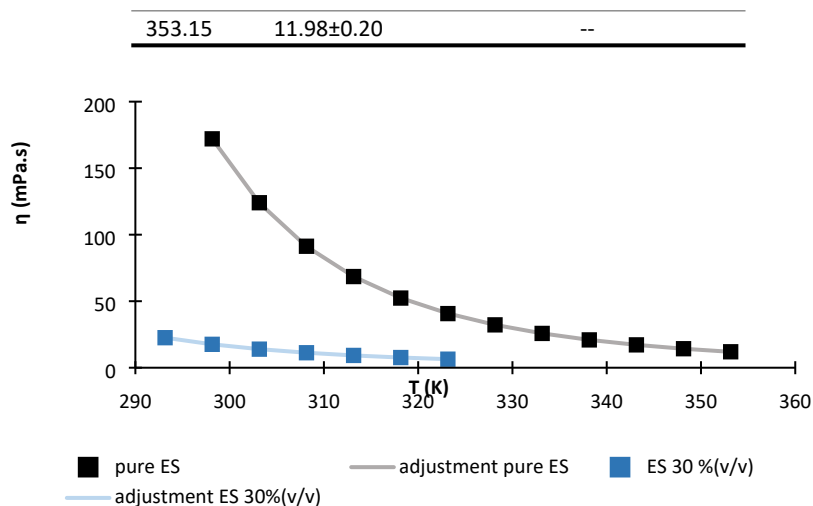

**Fig S.10.** Viscosities at different temperature for the pure ES Pro:1,2-But (1:4) (black) and with 30% (v/v) of water (blue).

**Table S.23.** Parameters obtained with the VFT adjustment for viscosity for the pure Pro:1,2-But (1:4) and with 30% (v/v) of water.

|          | pure Pro:1,2-But (1:4) | Pro:1,2-But (1:4) with 30% (v/v) of water |
|----------|------------------------|-------------------------------------------|
| $A_\eta$ | -10.997                | -10.368                                   |
| $B_\eta$ | 1250.875               | 835.455                                   |
| $C_\eta$ | 162.724                | 166.120                                   |
| $R^2$    | 0.999996               | 0.999997                                  |

### ChCl:CA (2:1)

The ES composed by ChCl and CA in a ratio of 2:1 was so viscous that It was nearly impossible to handle it without adding a little amount of water. Also, the densimeter used only presented good measurements until 1.3 g/cm<sup>3</sup>, therefore, water was added in order to reduce the density that was above 1.3 g/cm<sup>3</sup>. An attempt to add the smallest amount of water was made to have the ES the nearest possible from the pure ES. The amount of water added to perform the measurements in was 6.4% (w/w).

**Table S.24.** Densities measure at different temperatures for the ES ChCl:CA (2:1) with 6.4% (w/w).

| T (°C) | Density (g/cm <sup>3</sup> ) |
|--------|------------------------------|
| 293.15 | 1.2545±0.0092                |
| 295.15 | 1.2529±0.0092                |
| 297.15 | 1.2513±0.0092                |
| 299.15 | 1.2497±0.0092                |
| 301.15 | 1.2481±0.0093                |
| 303.15 | 1.246±0.0046                 |
| 305.15 | 1.2443±0.0046                |
| 307.15 | 1.2423±0.0047                |
| 309.15 | 1.2405±0.0093                |
| 311.15 | 1.2389±0.0047                |



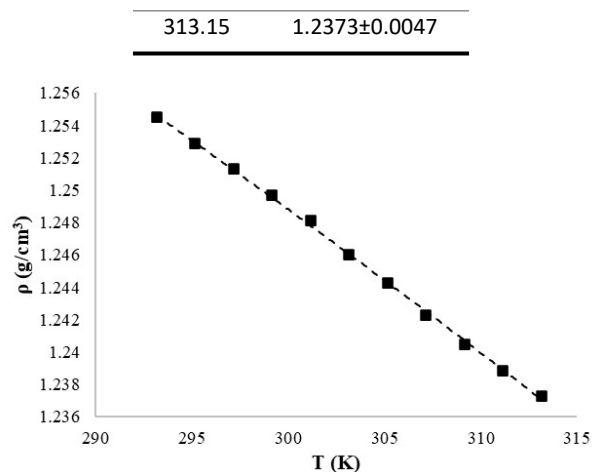

**Fig S.11.** Densities at different temperature from 293.15 to 313.15 K for the pure ES ChCl:CA (2:1):  $y = (-2.38 \pm 5.08) \times 10^{-6} x^2 + (-7.34 \pm 3.06) \times 10^{-5} x + (1270.25 \pm 4.46) \times 10^{-3}$  with  $R^2 = 0.99897$

**Table S.25.** Viscosities values of ChCl:CA (2:1) at different temperatures with only 6.4% (w/w) of water and with 30% (v/v).

| T (K)  | $\eta$ ES 6.4% (w/w) (mPa.s) | $\eta$ ES 30% (v/v) water (mPa.s) |
|--------|------------------------------|-----------------------------------|
| 293.15 | --                           | 62.48±0.03                        |
| 298.15 | 8877.27±3.40                 | 49.11±0.03                        |
| 303.15 | 5706.73±3.48                 | 39.22±0.02                        |
| 308.15 | 3767.40±3.51                 | 31.77±0.02                        |
| 313.15 | 2551.90±3.52                 | 26.09±0.02                        |
| 318.15 | 1769.03±3.58                 | 21.67±0.02                        |
| 323.15 | 1253.10±3.64                 | 18.21±0.02                        |
| 328.15 | 906.11±3.76                  | --                                |
| 333.15 | 666.44±3.56                  | --                                |
| 338.15 | 499.34±3.54                  | --                                |
| 343.15 | 379.83±3.35                  | --                                |
| 348.15 | 292.74±2.83                  | --                                |
| 353.15 | 228.89±2.39                  | --                                |

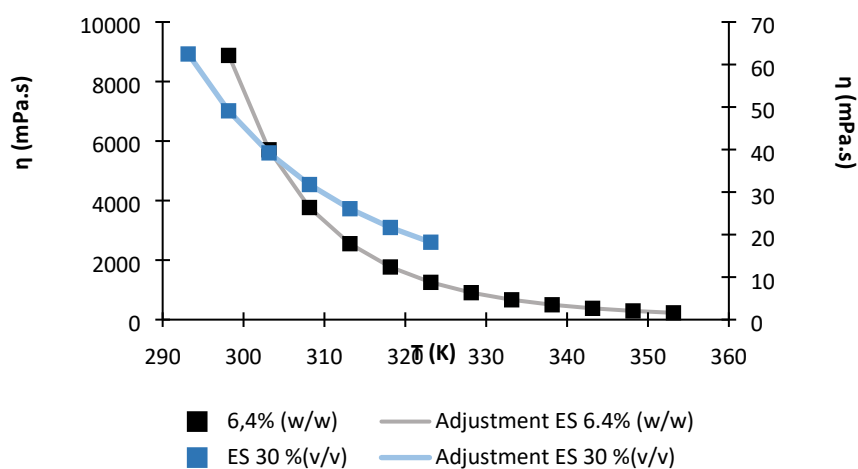

**Fig S.12.** Variation of viscosity with temperature for the ES ChCl:CA (2:1) with only 6.4% (w/w) (black-left axis) and with 30% (v/v) of water (blue-right axis).

**Table S.26.** Parameters for the VFT model adjusting the viscosity variation with temperature of ChCl:CA (2:1) with 6.4% (w/w) and (v/v) of water.

|          | ChCl:CA (2:1) with 6.4% (w/w) of water | ChCl:CA (2:1) with 30% (v/v) of water |
|----------|----------------------------------------|---------------------------------------|
| $A_\eta$ | -11.034                                | -9.684                                |
| $B_\eta$ | 1898.62216                             | 954.377                               |
| $C_\eta$ | 154.528                                | 155.073                               |
| $R^2$    | 0.999999                               | 1.0000                                |

## B.2. Excess volumes

An excess property ( $X^E$ ) is given by the different of the real value and the value corresponding to ideality, equation (S.7) <sup>7</sup>.

$$X^E = \Delta_{mixture} X^{Real} - \Delta_{mixture} X^{Ideal} \quad (S.7)$$

The molar volume ( $V_m$ ) of a pure compound i can be determined by expression (S.8) where MW is the molecular weight (g/mol) and  $\rho$  is the density (g/cm<sup>3</sup>). The ideal  $V_m$  of a mixture of two compounds is given the sum of  $V_m$  of each one.

$$V_{mi} = \frac{MW_i}{\rho_i} \quad (S.8)$$

To calculate the real  $V_m$  of a mixture of compound i and j, it is necessary to be aware of the exact composition and have the value of the density for the mixture. Further the real  $V_m$  can be easily calculated using expression (S.9). Note that one of the compounds is the ES and the other one is water, so there is a need to determine the exact MW of the ES.

$$V_m = \frac{x_i MW_i + x_j MW_j}{\rho_{mixture}} \quad (S.9)$$

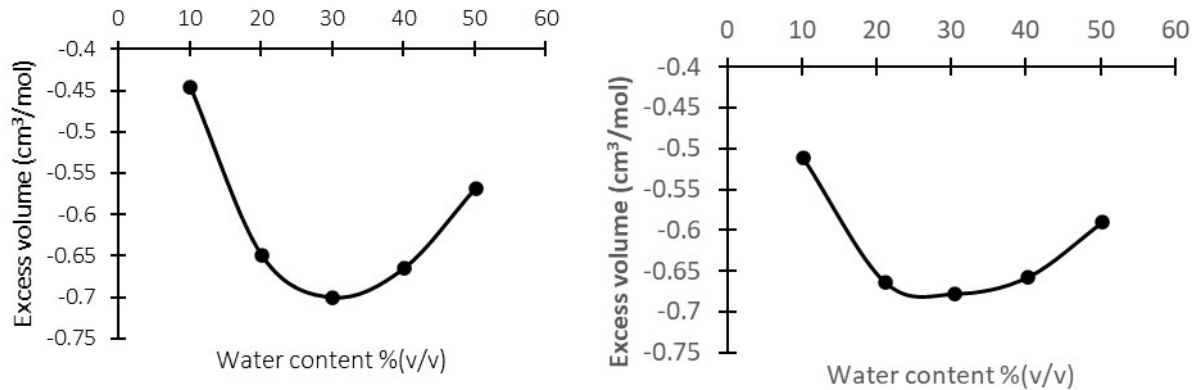

**Fig S.13.** Variation of the excess volumes with water content for two of the three best ESs: (a) Pro:PPG (1:4), (b) Pro:1,4-But (1:4)

### B.3. Polarity essay - Solvatochromic probes

**Table S.27.** Polarity results from the solvatochromic probes for the betaine scale ( $E_TN$ ) and fot Kamlet-Taft scale ( $\alpha$ ,  $\beta$ ,  $\pi^*$ ).

|                          |     | $\alpha$ | $\beta$ | $\pi^*$ | $E_T(33)$ (kcal/mol) | $E_TN$ |
|--------------------------|-----|----------|---------|---------|----------------------|--------|
| <b>Pro:PPG (1:4)</b>     | 0%  | 0.478    | 0.729   | 0.873   | 56.709               | 0.544  |
|                          | 10% | 0.432    | 0.686   | 0.959   | 56.954               | 0.552  |
|                          | 20% | 0.393    | 0.599   | 1.034   | 57.182               | 0.559  |
|                          | 30% | 0.387    | 0.574   | 1.102   | 57.857               | 0.579  |
|                          | 40% | 0.300    | 0.470   | 1.162   | 57.182               | 0.559  |
|                          | 50% | 0.328    | 0.438   | 1.205   | 58.092               | 0.587  |
| <b>Pro:1,2-But (1:4)</b> | 0%  | 0.613    | 0.799   | 0.776   | 57.721               | 0.575  |
|                          | 10% | 0.540    | 0.749   | 0.889   | 57.837               | 0.579  |
|                          | 20% | 0.493    | 0.695   | 0.959   | 57.896               | 0.581  |
|                          | 30% | 0.427    | 0.541   | 1.052   | 57.916               | 0.581  |
|                          | 40% | 0.446    | 0.621   | 1.034   | 58.014               | 0.584  |
|                          | 50% | 0.392    | 0.555   | 1.134   | 58.290               | 0.593  |
| <b>ChCl:CA (2:1)</b>     | 20% | 2.454    | 0.032   | 1.409   | 93.282               | 1.668  |
|                          | 30% | 2.603    | 0.411   | 1.202   | 93.282               | 1.668  |
|                          | 40% | 2.592    | 0.346   | 1.236   | 93.486               | 1.674  |
|                          | 50% | 2.612    | 0.318   | 1.264   | 94.101               | 1.693  |

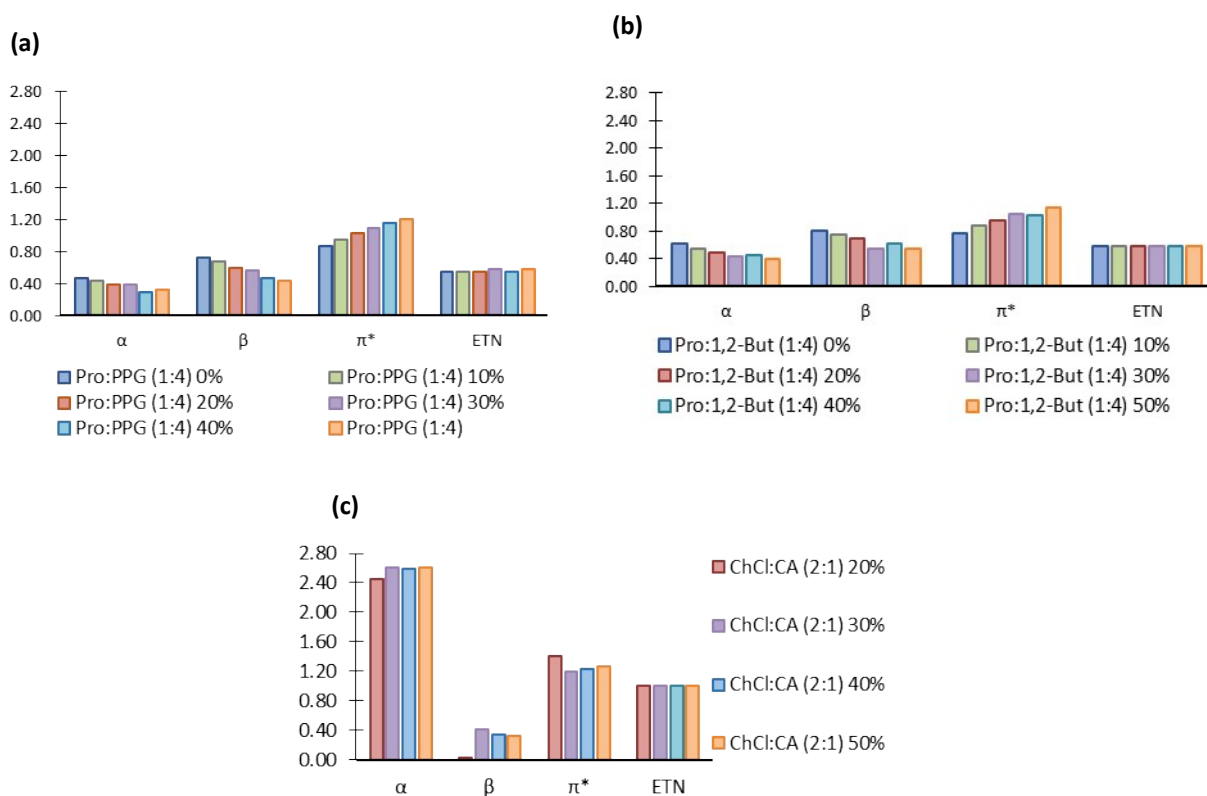

**Fig S.14.** Solvatochromic results for the proline-based ESs (a) Pro:PPG (1:4), (b) Pro:1,2-But (1:4) and (c) ChCl:CA (2:1) for the different water contents.

The overall polarity can be quantified through betaine scale with the  $E_T N$  parameter that ranges between 0 and 1.

Since a single polarity probe is not enough to understand the polarity of aqueous solutions of ESs, a more complete system as the Kamlet-Taft, which has three parameters, needs to be considered. Pro:1,2-But (1:4) presents a higher HBD ability,  $\alpha$ , in comparison with Pro:PPG (1:4) for all water contents, which might indicate that 1,2-Butanediol has a slightly higher HBD capacity than propylene glycol. These two molecules have the same quantity of hydroxyl groups placed in the same positions, the difference is one additional methyl group attached to the end of the chain for 1,2-Butanediol, which can be related with a slightly higher HBD capacity.

Since the same HBA is present in both Pro:PPG (1:4) and Pro:1,2 But (1:4), it would be expected that these two ESs have similar HBA ability. This is confirmed through the similar values of the  $\beta$  values for both Pro:PPG (1:4) and Pro:1,2-But (1:4). Both ESs show the same tendency for  $\beta$  that was observed for  $\alpha$ , a decrease the HBA ability with water content. Basically, the addition of water decreases the HBA and HBD abilities of both proline-based ESs. The  $\beta$  values for ChCl:CA (2:1) and its aqueous solutions are very low compared with the  $\alpha$  values, 6 to 8 times lower. This indicates that the polarity of this ES is mainly due to its HBD ability. For 20% (v/v) water content in ChCl:CA(2:1), the  $\beta$  value determined is practically null. This is probably due to the high viscosity of this ES even with 20% (v/v) of water. Neglecting this value, a decrease behaviour of the  $\beta$  for ChCl:CA (2:1) with the increase of water content, just like the proline-based ESs.

The  $\pi^*$  Kamlet-Taft parameters give a quantitative information about the polarizability and dipolarity. The  $\pi^*$  values for Pro:PPG (1:4) were slightly higher than those of Pro:1,2-But (1:4), while ChCl:CA (2:1) shows higher  $\pi^*$  values. Once again, ChCl:CA (2:1) with 20% (v/v) does not follow the trend, which can be again related with the viscosity and difficult solubilization of the probes.

In **Fig S.14** (a), the  $\alpha$  value for Pro:PPG (1:4) with 40% (v/v) is lower than the  $\alpha$  value for Pro:PPG (1:4) with 50% (v/v). This creates an incoherency in the trend observed, which is that  $\alpha$  values decrease with the increase of water content. However, this incoherency only happens in  $\alpha$ , which can mean that this may be due to experimental errors. On the other hand, this behaviour is seen for Pro:1,2-But with 30% (v/v) for all Kamlet-Taft parameters ( $\alpha$ ,  $\beta$  and  $\pi^*$ ), where its values are lower than Pro:1,2-But (1:4) with 40% (v/v). The way how the probes interact with the solvent has a great impact on these parameters. As mentioned before, the maximum volume contraction occurs at 30% (v/v) of water, due to the formation of strong hydrogen bonds between ESs and water. This can generate a robust hydrogen bond matrix, hindering the probe interaction with the ES, returning lower values than expected. Although the Pro:PPG (1:4) also has its maximum volume contraction at 30% (v/v), the trend seen of all Kamlet-Taft parameters for Pro:1,2-But (1:4) it is not observed for Pro:PPG (1:4). The 1,2-Butanediol possesses one additional methyl group than propylene glycol, providing two more hydrogens to its structure which can have influence on the results seen in **Fig S.14**.

## C. Statistical treatment of results

### C.1. ES screening

Table S.28. Tukey HSD test for ES screening.

|                    | A     | B     | C     | D     | E     | F     | G     | H     | I     | J     | K     | L     | M      | N      |
|--------------------|-------|-------|-------|-------|-------|-------|-------|-------|-------|-------|-------|-------|--------|--------|
| ChCl:Gly (1:4)     | 12.82 |       |       |       |       |       |       |       |       |       |       |       |        |        |
| Bet:PPG (1:4)      |       | 17.37 |       |       |       |       |       |       |       |       |       |       |        |        |
| ChCl:PPG (1:4)     |       | 17.49 |       |       |       |       |       |       |       |       |       |       |        |        |
| Ethanol            |       | 19.50 |       |       |       |       |       |       |       |       |       |       |        |        |
| Bet:Gly (1:4)      |       |       | 23.05 |       |       |       |       |       |       |       |       |       |        |        |
| Water              |       |       | 23.36 |       |       |       |       |       |       |       |       |       |        |        |
| Bet:LA (1:1)       |       |       |       | 26.88 |       |       |       |       |       |       |       |       |        |        |
| Pro:Gly (1:4)      |       |       |       | 29.31 |       |       |       |       |       |       |       |       |        |        |
| Bet:1.2-But (1:3)  |       |       |       |       | 32.75 |       |       |       |       |       |       |       |        |        |
| ChCl:1.3-But (1:4) |       |       |       |       | 33.08 |       |       |       |       |       |       |       |        |        |
| Bet:LA (1:2)       |       |       |       |       | 33.97 |       |       |       |       |       |       |       |        |        |
| Pro:LA (1:1)       |       |       |       |       |       | 37.97 |       |       |       |       |       |       |        |        |
| Pro:LA (1:2)       |       |       |       |       |       | 38.99 |       |       |       |       |       |       |        |        |
| ChCl:LA (1:1)      |       |       |       |       |       | 39.54 |       |       |       |       |       |       |        |        |
| Pro:1.2-But (1:3)  |       |       |       |       |       | 40.48 | 40.48 |       |       |       |       |       |        |        |
| ChCl:LA (1:3)      |       |       |       |       |       |       | 43.09 | 43.09 |       |       |       |       |        |        |
| Pro:1.3-But (1:4)  |       |       |       |       |       |       | 43.18 | 43.18 |       |       |       |       |        |        |
| Bet:1.3-But (1:4)  |       |       |       |       |       |       |       | 44.05 |       |       |       |       |        |        |
| ChCl:1.2-But (1:3) |       |       |       |       |       |       |       | 44.85 | 44.85 |       |       |       |        |        |
| Bet:LA (1:3)       |       |       |       |       |       |       |       |       | 47.87 | 47.87 |       |       |        |        |
| Pro:LA (1:3)       |       |       |       |       |       |       |       |       |       | 49.71 |       |       |        |        |
| Bet:1.2-But (1:4)  |       |       |       |       |       |       |       |       |       |       | 53.05 |       |        |        |
| ChCl:LA (1:2)      |       |       |       |       |       |       |       |       |       |       | 55.50 |       |        |        |
| ChCl:CA (1:2)      |       |       |       |       |       |       |       |       |       |       | 55.53 |       |        |        |
| ChCl:CA (2:1)      |       |       |       |       |       |       |       |       |       |       |       | 68.11 |        |        |
| ChCl:CA (1:1)      |       |       |       |       |       |       |       |       |       |       |       | 70.01 |        |        |
| Pro:1.2-But (1:4)  |       |       |       |       |       |       |       |       |       |       |       |       | 119.81 |        |
| Pro:PPG (1:4)      |       |       |       |       |       |       |       |       |       |       |       |       |        | 210.48 |
| Sig.               | 1     | 0.73  | 1     | 0.48  | 1.00  | 0.41  | 0.28  | 0.94  | 0.12  | 0.91  | 0.44  | 0.88  | 1      | 1      |

### C.2. UAE

Table S.29. Tukey HSD test for UAE using Pro:PPG (1:4).

| UAE          | N | Subset for alpha = 0.05 |         |         |          |          |
|--------------|---|-------------------------|---------|---------|----------|----------|
|              |   | A                       | B       | C       | D        | E        |
| 20 W, 1,5min | 3 | 21.4507                 |         |         |          |          |
| 20 W, 3min   | 3 |                         |         | 39.2617 |          |          |
| 10 W, 3min   | 3 |                         | 30.6597 |         |          |          |
| 10 W, 6min   | 3 |                         |         |         | 140.1407 |          |
| 10 W, 9min   | 3 |                         |         |         |          | 170.0563 |
| Sig.         |   | 1.000                   | 1.000   | 1.000   | 1.000    | 1.000    |

a. Uses Harmonic Mean Sample Size = 3.000; b. Alpha = .05.

Table S.30. Tukey HSD test for UAE using Pro:1,2-But (1:4).

| UAE | N | Subset |
|-----|---|--------|
|-----|---|--------|

|              |   | A       | B       | C       | D       |
|--------------|---|---------|---------|---------|---------|
| 20 W, 1,5min | 3 | 45.8200 |         |         |         |
| 20 W, 3min   | 3 |         | 58.2137 |         |         |
| 10 W, 3min   | 3 | 46.5990 |         |         |         |
| 10 W, 6min   | 3 |         |         | 63.4497 |         |
| 10 W, 9min   | 3 |         |         |         | 69.9553 |
| Sig.         |   | 0.459   | 1.000   | 1.000   | 1.000   |

a. Uses Harmonic Mean Sample Size = 3.000; b. Alpha = .05.

**Table S.31.** Tukey HSD test for UAE using ChCl:CA (2:1).

| UAE          | N | Subset  |         |         |
|--------------|---|---------|---------|---------|
|              |   | A       | B       | D       |
| 20 W, 1,5min | 3 | 27.1100 |         |         |
| 20 W, 3min   | 3 |         | 34.6827 |         |
| 10 W, 3min   | 3 | 27.9957 |         |         |
| 10 W, 6min   | 3 |         |         |         |
| 10 W, 9min   | 3 |         |         | 44.8553 |
| Sig.         |   | 0.101   | 1.000   | 1.000   |

a. Uses Harmonic Mean Sample Size = 3.000;. b. Alpha = .05

### C.3. MAE

**Table S.32.** Tukey HSD test for MAE using Pro:PPG (1:4).

| MAE            | N | Subset  |         |          |          |          |
|----------------|---|---------|---------|----------|----------|----------|
|                |   | A       | B       | C        | D        | E        |
| 60 °C, 3min    | 3 | 23.8740 |         |          |          |          |
| 60 °C, 9min    | 3 | 26.7358 |         |          |          |          |
| 60 °C, 6min    | 3 |         | 38.1610 |          |          |          |
| 100 °C, 1,5min | 3 |         |         | 178.6694 |          |          |
| 100 °C, 3min   | 3 |         |         |          | 198.3911 |          |
| 100 °C, 6min   | 3 |         |         |          |          | 288.3076 |
| Sig.           |   | 0.852   | 1.000   | 1.000    | 1.000    | 1.000    |

a. Uses Harmonic Mean Sample Size = 3.000; b. Alpha = .05.

**Table S.33.** Tukey HSD test for MAE using Pro:1,2-But (1:4).

| MAE            | N | Subset  |         |         |         |         |   |
|----------------|---|---------|---------|---------|---------|---------|---|
|                |   | A       | B       | C       | D       | E       | F |
| 100 °C, 1,5min | 3 | 60.8991 |         |         |         |         |   |
| 100 °C, 3min   | 3 |         | 63.6823 |         |         |         |   |
| 100 °C, 6min   | 3 |         |         | 76.7210 |         |         |   |
| 60 °C, 3min    | 3 |         |         |         | 29.6155 |         |   |
| 60 °C, 6min    | 3 |         |         |         |         | 50.9728 |   |

|                                            |   |                 |       |       |       |       |         |
|--------------------------------------------|---|-----------------|-------|-------|-------|-------|---------|
| 60 °C, 9min                                | 3 |                 |       |       |       |       | 45.0595 |
| Sig.                                       |   | 1.000           | 1.000 | 1.000 | 1.000 | 1.000 | 1.000   |
| a. Uses Harmonic Mean Sample Size = 3.000. |   | b. Alpha = .05. |       |       |       |       |         |

**Table S.34.** Tukey HSD test for MAE using ChCl:CA (2:1).

| MAE                                        | N | Subset          |         |         |         |         |         |
|--------------------------------------------|---|-----------------|---------|---------|---------|---------|---------|
|                                            |   | A               | B       | C       | D       | E       | F       |
| 100 °C, 1,5min                             | 3 | 40.1427         |         |         |         |         |         |
| 100 °C, 3min                               | 3 |                 | 21.1369 |         |         |         |         |
| 100 °C, 6min                               | 3 | 39.7978         |         |         |         |         |         |
| 60 °C, 3min                                | 3 |                 |         | 34.8743 |         |         |         |
| 60 °C, 6min                                | 3 |                 |         |         | 30.3256 |         |         |
| 60 °C, 9min                                | 3 |                 |         |         |         | 32.6631 |         |
| 60 °C, 12min                               | 3 |                 |         |         |         |         | 25.7728 |
| Sig.                                       |   | 0.858           | 1.000   | 1.000   | 1.000   | 1.000   | 1.000   |
| a. Uses Harmonic Mean Sample Size = 3.000. |   | b. Alpha = .05. |         |         |         |         |         |

## References

- 1 J. Huguenin, S. O. S. Hamady and P. Bourson, *Journal of Raman Spectroscopy*, 2015, **46**, 1062–1066.
- 2 R. M. Smith and A. E. Martell, *Critical Stability Constants*.
- 3 J. M. Herrero-Martínez, M. Sanmartin, M. Rosés, E. Bosch and C. Ràfols, *Electrophoresis*, 2005, **26**, 1886–1895.
- 4 J. L. Beltrán, N. Sanli, G. Fonrodona, D. Barrón, G. Özkan and J. Barbosa, *Anal Chim Acta*, 2003, **484**, 253–264.
- 5 E. Dinç, F. Selimoğlu, N. Ünal and Z. C. Ertekin, *Anal Lett*, 2021, **54**, 2624–2637.
- 6 J. M. Herrero-Martínez, M. Sanmartin, M. Rosés, E. Bosch and C. Ràfols, *Electrophoresis*, 2005, **26**, 1886–1895.
- 7 K. J. Atkins, P. W., de Paula J., *Oxford University Press, Oxford*, 2017, 944.
